# Supplementary material
Source: MDPI journal article supplement (https://www.mdpi.com/2073-4352/13/2/352)
Supplement: s1 [file s1]

# Supporting Information

## Textile Functionalization by Porous Protein Crystal Conjugation and Guest Molecule Loading

Luke F. Hartje, David A. Andales, Lucas P. Gintner, Lucas B. Johnson, Yan V. Li, and Christopher D. Snow

### CJ Protein Sequence:

MKEYTLDKAHTDVGFKIKHLQISNVKGNFKDYSAVIDFDPASAEFKKLDVTIKIASVNTENQTRDNHLQDDFFKAKKYPD  
MTFTMKKYEKIDNEKGKMTGTLTIAGVSKDIVLDAEIGGVAKGKDGKEKIGFSLNGKIKRSDFKFATSTSTITLSDDINLNIEV  
EANEKEGGSHHHHHH

### CJ DNA Sequence:

TTAAGAAGGAGATATACATATGAAAAAAGTTCTGCTGAGCAGCCTGGTTGCAGTTAGCCTGCTGAGTACCGGTCTGTTT  
GCAAAAGAATATACCTGGATAAAGCCCATACCGATGTTGGCTTTAAATCAAACATCTGCAGATTAGCAATGTGAAA  
GGCAACTTTAAAGATTATAGCGCAGTGATCGATTTTGATCCGGCAAGTGCAGAATTCAAAAAACTGGATGTGACCATTA  
AAATCGCCAGCGTGAATACCGAAAATCAGACCCGTGATAATCATCTGCAGCAGGATGACTTCTTCAAAGCCAAAAAAT  
ACCCGGATATGACCTTTACCATGAAAAAATACGAGAAAATCGATAACGAAAAAGGCAAAATGACCGGCACCCTGACC  
ATTGCCGGTGTTAGCAAAGATATTGTTCTGGATGCAGAAATTGGTGGTGTGCCAAAGGTAAAGATGGCAAAGAAAAA  
ATTGGCTTTAGCCTGAACGGCAAAATCAAACGTAGCGATTTCAAATTTGCAACCAGCACCAGCACCATTACCCTGAGTG  
ATGACATTAATCTGAACATTGAAGTGAAAGCCAACGAGAAAGAAGGTGGTAGTCATCACCACCACCATCACTAATAAC  
TCGAGCACCACCACCACCACCCTGAGATCCGGCTG

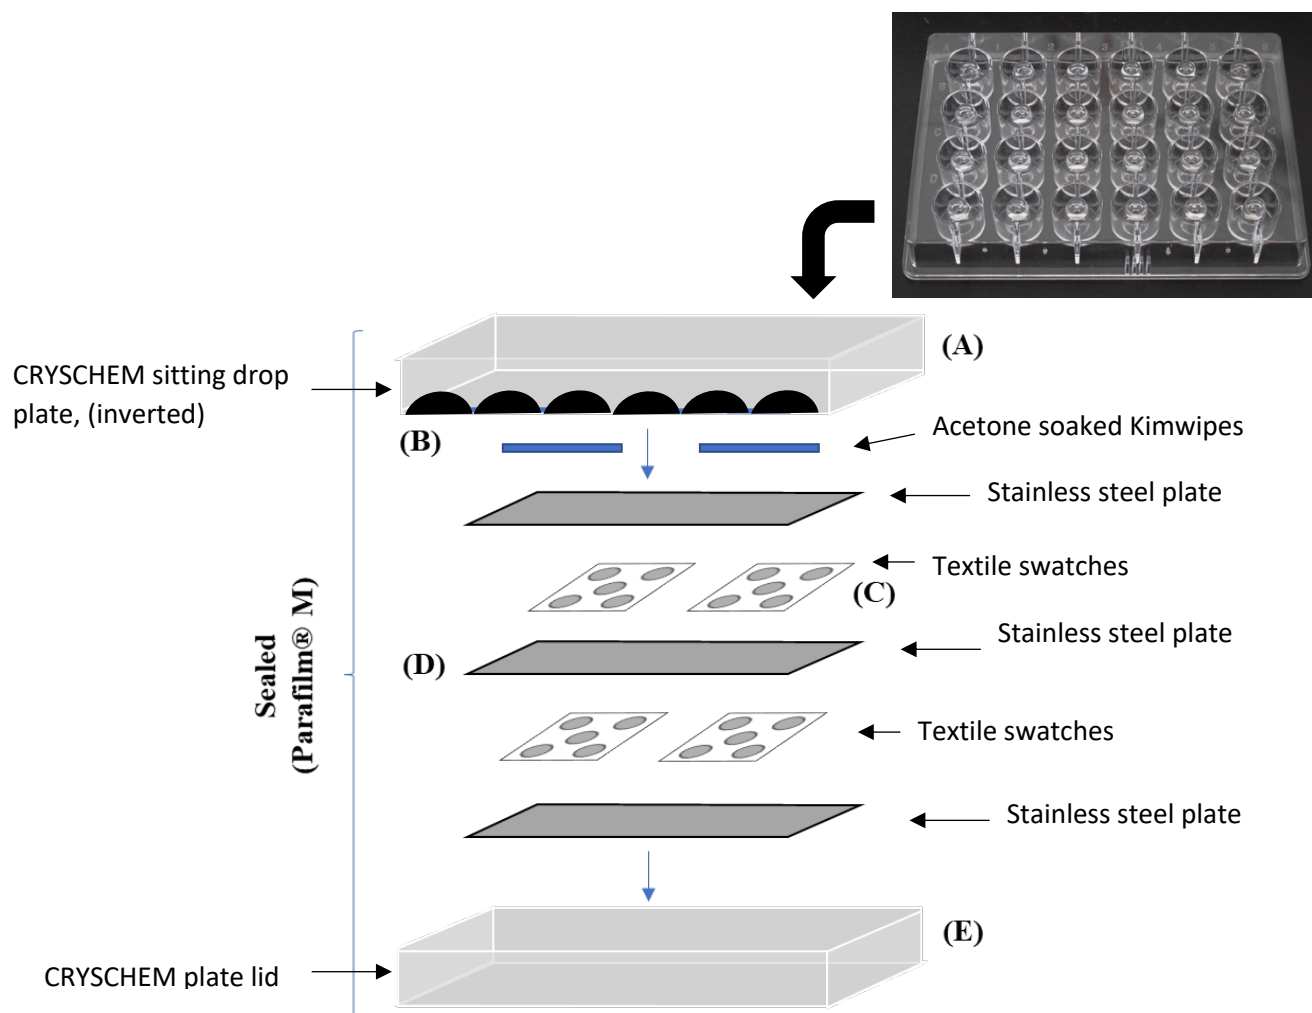

**Figure S1.** CDI treatment incubation in “sandwich” apparatus: (A) 24-well sitting drop crystallization plate. (B) Kimwipes® saturated with acetone to prevent drying. (C) Fabric swatches activated with CDI at 5 evenly distributed locations. (D) Stainless steel plate to provide weight and prevent corrosion of plastic crystallization plate. (E) Crystallization plate cover.

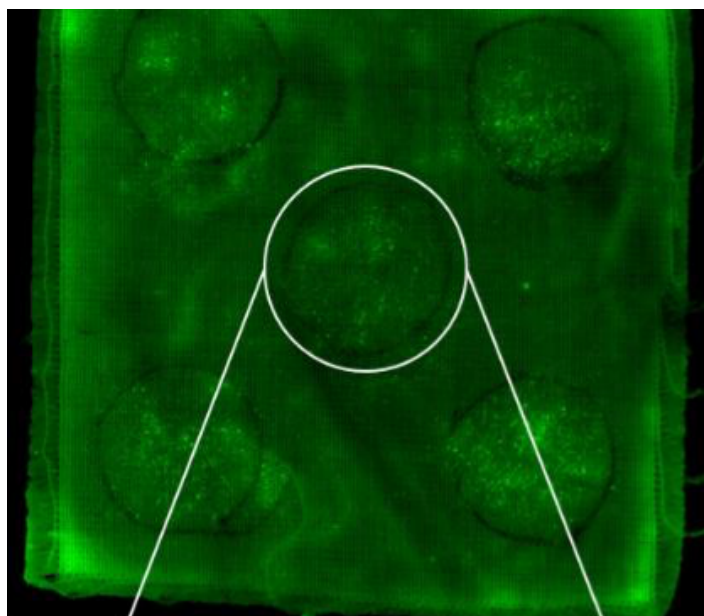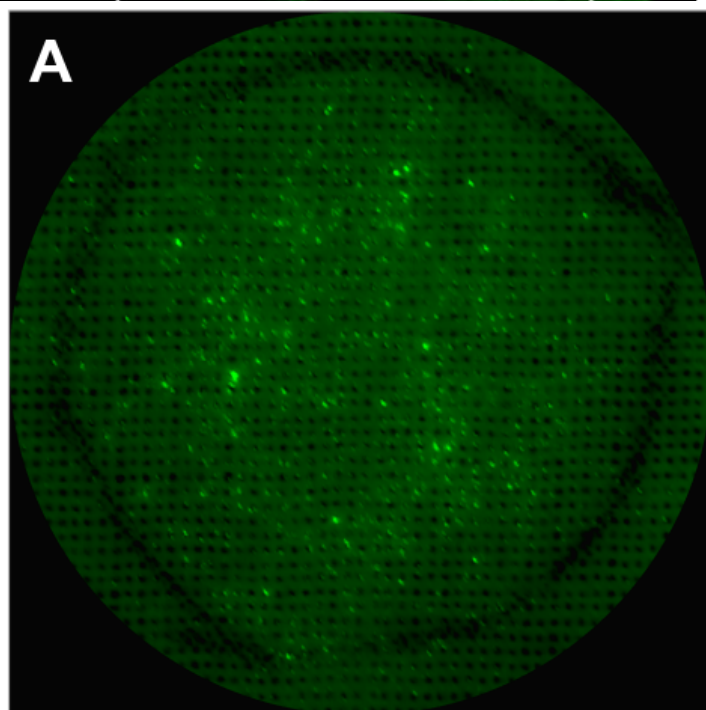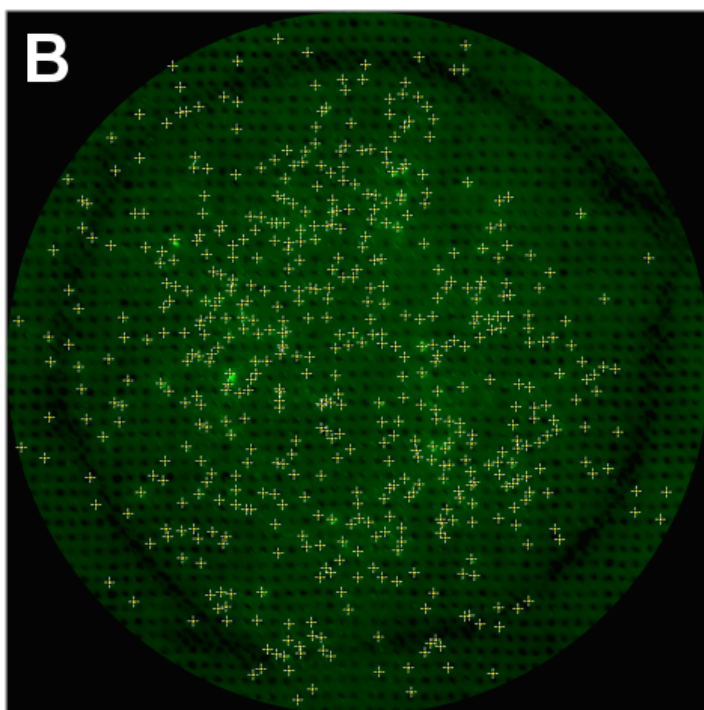

**Figure S2. (A)** Representative Typhoon image showing labeled HEWL crystals. **(B)** Detection and quantification of crystal puncta in Fiji. Consistent imaging and puncta detection parameters were used after each accelerated laundering interval.

**Table S1.** HEWL crystal retention using CDI-only conjugation.

|      |           | Time (min.) | R1   | R2   | R3   | R4   | R5   | Total Count   |
|------|-----------|-------------|------|------|------|------|------|---------------|
|      |           | 0           | 191  | 177  | 175  | 178  | 180  |               |
|      |           | 15          | 121  | 134  | 107  | 116  | 121  |               |
|      |           | 30          | 91   | 95   | 89   | 66   | 75   |               |
|      |           | 45          | 68   | 78   | 55   | 45   | 48   |               |
| Ave. | Std. Dev. | 60          | 52   | 52   | 42   | 15   | 23   | Norm. Percent |
| 100  | 0         | 0           | 100  | 100  | 100  | 100  | 100  |               |
| 66.5 | 5.6       | 15          | 63.4 | 75.7 | 61.1 | 65.2 | 67.2 |               |
| 46.2 | 6.8       | 30          | 47.6 | 53.7 | 50.9 | 37.1 | 41.7 |               |
| 32.6 | 7.6       | 45          | 35.6 | 44.1 | 31.4 | 25.3 | 26.7 |               |
| 20.4 | 9.2       | 60          | 27.2 | 29.4 | 24.0 | 8.4  | 12.8 |               |

**Table S2.** HEWL crystal retention using CDI+AAD+GA conjugation.

|      |           | Time (min.) | R1   | R2   | R3   | R4   | R5   | Total Count   |
|------|-----------|-------------|------|------|------|------|------|---------------|
|      |           | 0           | 476  | 517  | 365  | 335  | 517  |               |
|      |           | 15          | 319  | 380  | 249  | 216  | 376  |               |
|      |           | 30          | 283  | 319  | 190  | 180  | 314  |               |
|      |           | 45          | 216  | 286  | 156  | 152  | 282  |               |
| Ave. | Std. Dev. | 60          | 182  | 266  | 150  | 123  | 207  | Norm. Percent |
| 100  | 0         | 0           | 100  | 100  | 100  | 100  | 100  |               |
| 66.5 | 5.6       | 15          | 67.0 | 73.5 | 68.2 | 64.5 | 72.7 |               |
| 46.2 | 6.8       | 30          | 59.5 | 61.7 | 52.1 | 53.7 | 60.7 |               |
| 32.6 | 7.6       | 45          | 45.4 | 55.3 | 42.7 | 45.4 | 54.5 |               |
| 20.4 | 9.2       | 60          | 38.2 | 51.5 | 41.1 | 36.7 | 40.0 |               |

**Table S3.** CJ-LPC retention using CDI+AAD+OA conjugation.

|      |           | Time (min.) | R1   | R2   | R3   | R4   | R5   | Total Count   |
|------|-----------|-------------|------|------|------|------|------|---------------|
|      |           | 0           | 139  | 127  | 142  | 159  | 151  |               |
|      |           | 15          | 75   | 76   | 72   | 69   | 107  |               |
|      |           | 30          | 48   | 66   | 69   | 54   | 79   |               |
|      |           | 45          | 50   | 85   | 61   | 54   | 72   |               |
| Ave. | Std. Dev. | 60          | 42   | 53   | 53   | 43   | 64   | Norm. Percent |
| 100  | 0         | 0           | 100  | 100  | 100  | 100  | 100  |               |
| 66.5 | 5.6       | 15          | 54.0 | 59.8 | 50.7 | 43.4 | 70.9 |               |
| 46.2 | 6.8       | 30          | 34.5 | 52.0 | 48.6 | 34.0 | 52.3 |               |
| 32.6 | 7.6       | 45          | 36.0 | 66.9 | 43.0 | 34.0 | 47.7 |               |
| 20.4 | 9.2       | 60          | 30.2 | 41.7 | 37.3 | 27.0 | 42.4 |               |

\*Red data point indicates an outlier that was removed from the average and standard deviation in Figure 3.

**Table S4.** CJ-LPC retention using CDI+AAD+GA conjugation.

|      |           | Time (min.) | R1   | R2   | R3   | R4   | R5   | Total Count   |
|------|-----------|-------------|------|------|------|------|------|---------------|
|      |           | 0           | 659  | 861  | 497  | 393  | 685  |               |
|      |           | 15          | 525  | 633  | 335  | 295  | 524  |               |
|      |           | 30          | 433  | 543  | 276  | 236  | 445  |               |
|      |           | 45          | 332  | 433  | 216  | 198  | 365  |               |
| Ave. | Std. Dev. | 60          | 293  | 379  | 202  | 163  | 309  | Norm. Percent |
| 100  | 0         | 0           | 100  | 100  | 100  | 100  | 100  |               |
| 66.5 | 5.6       | 15          | 79.7 | 73.5 | 67.4 | 75.1 | 76.5 |               |
| 46.2 | 6.8       | 30          | 65.7 | 63.1 | 55.5 | 60.1 | 65.0 |               |
| 32.6 | 7.6       | 45          | 50.4 | 50.3 | 43.5 | 50.4 | 53.3 |               |
| 20.4 | 9.2       | 60          | 44.5 | 44.0 | 40.6 | 41.5 | 45.1 |               |

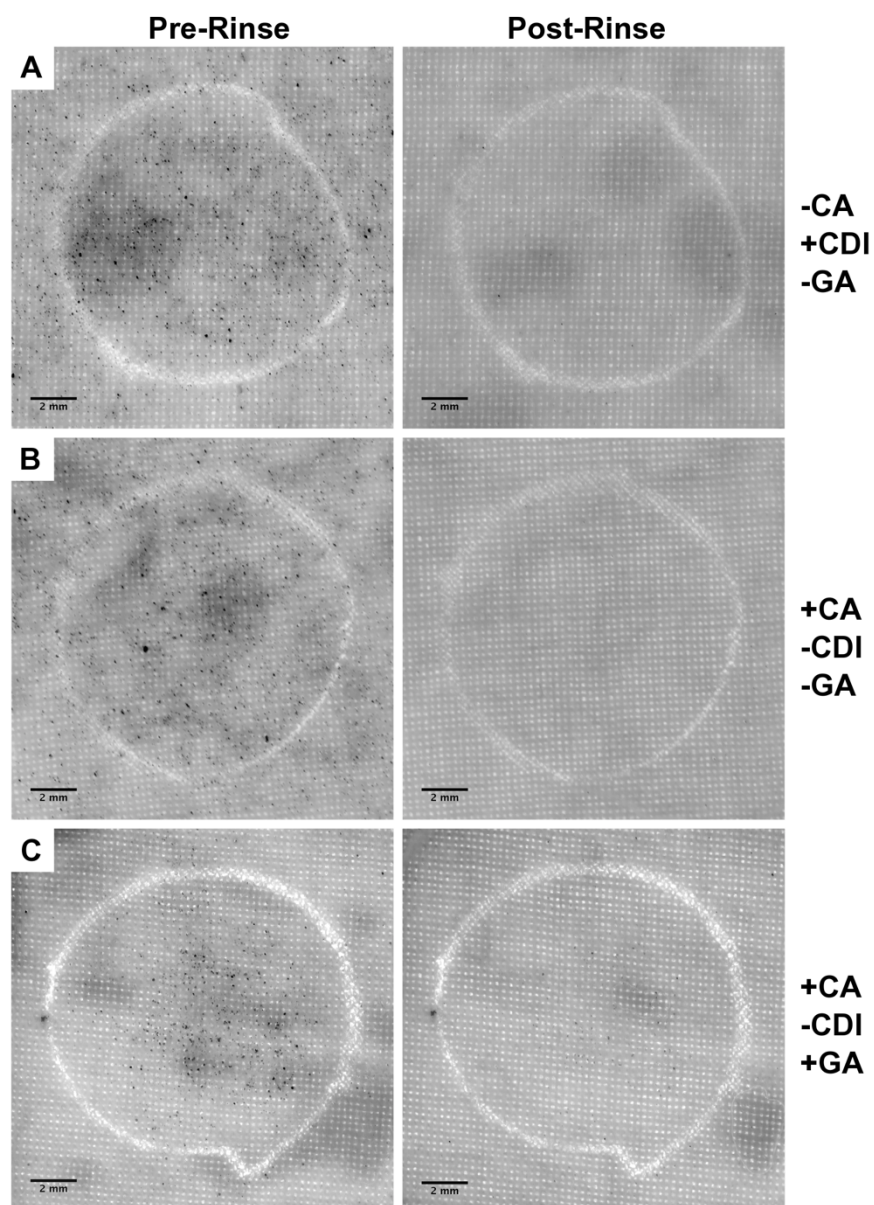

**Figure S3.** Control samples for protein crystal conjugation to cotton fabric. *Left:* pre-H<sub>2</sub>O rinse; *Right:* post DI H<sub>2</sub>O rinse, note: samples were not subjected to any laundering time. GA cross-linked, quenched, and NHS-fluorescein trace-labeled HEWL crystals were used in all samples. **(A)** Cotton not activated with citric acid. **(B)** Cotton not treated (conjugated) with CDI. **(C)** Cotton activated with citric acid and treated (conjugated) with GA.

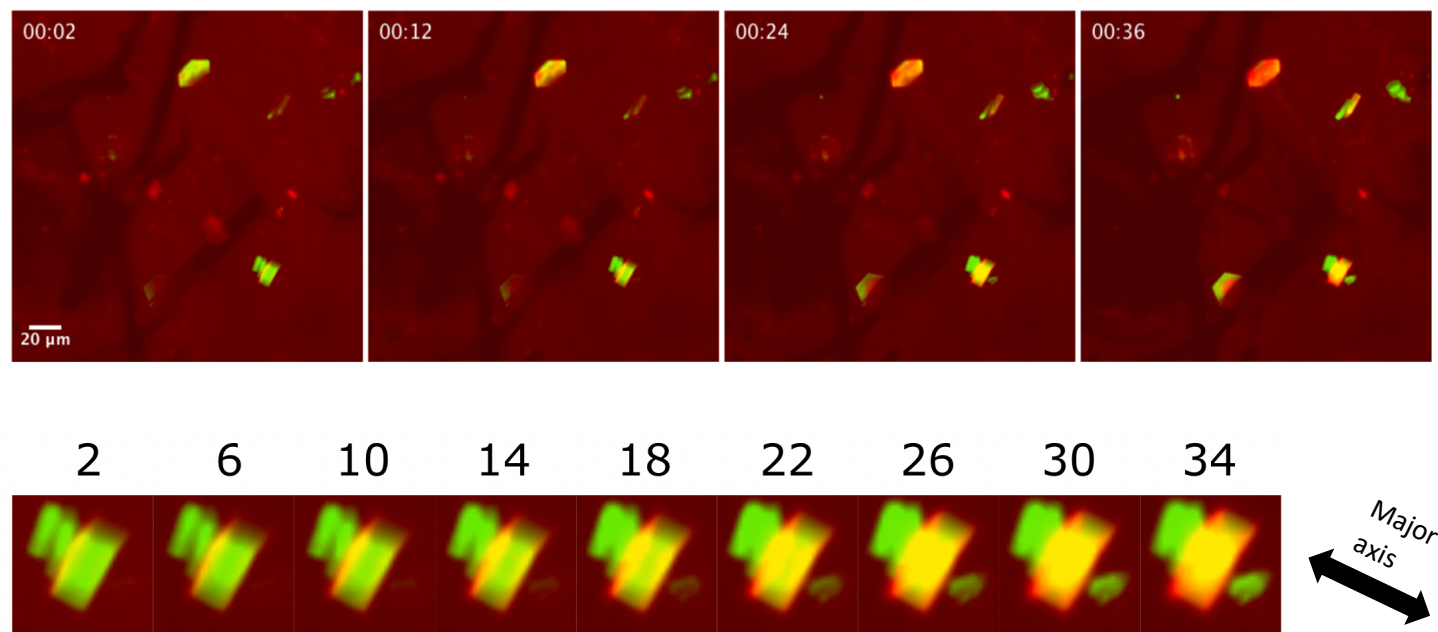

**Figure S4.** Top row: time-lapse images of sulforhodamine-labeled P450 (red) loading into GA cross-linked CJ-LPCs (green) conjugated to cotton fabric using a CDI+AAD+GA conjugation scheme over the course of 36 min. These are selected snapshots from the Supplementary Video 2: PorousCrystalEnzymeLoading.avi.

Bottom row: zoomed-in view of crystal from lower-right. Anisotropic guest uptake occurs along the major axis.



**A** Merged Image

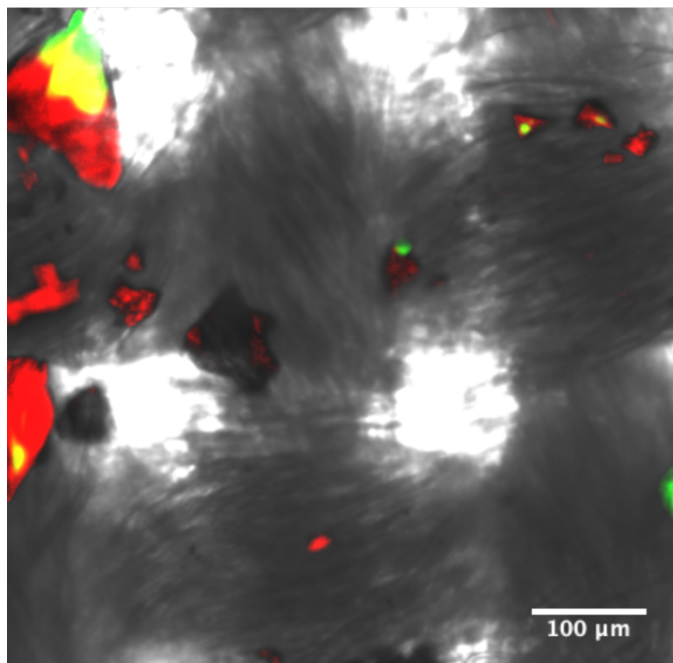

**B** NHS-Fluorescein-labeled HEWL Crystals

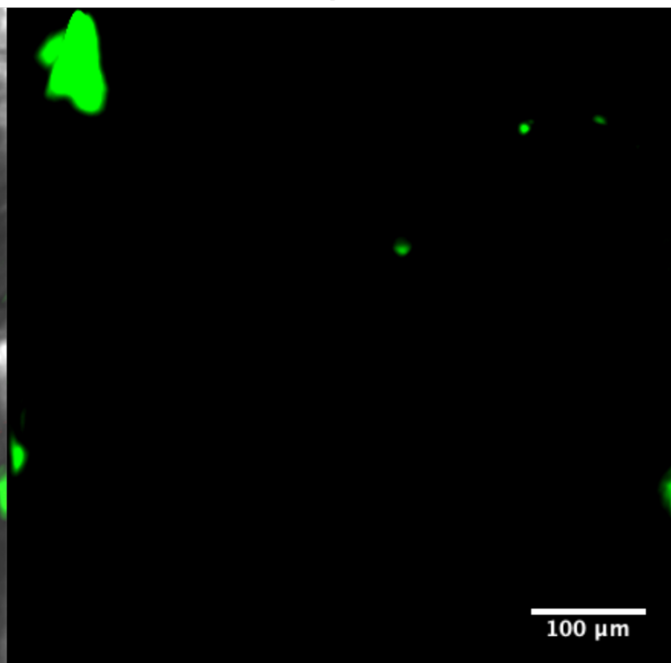

**C** DIC Image

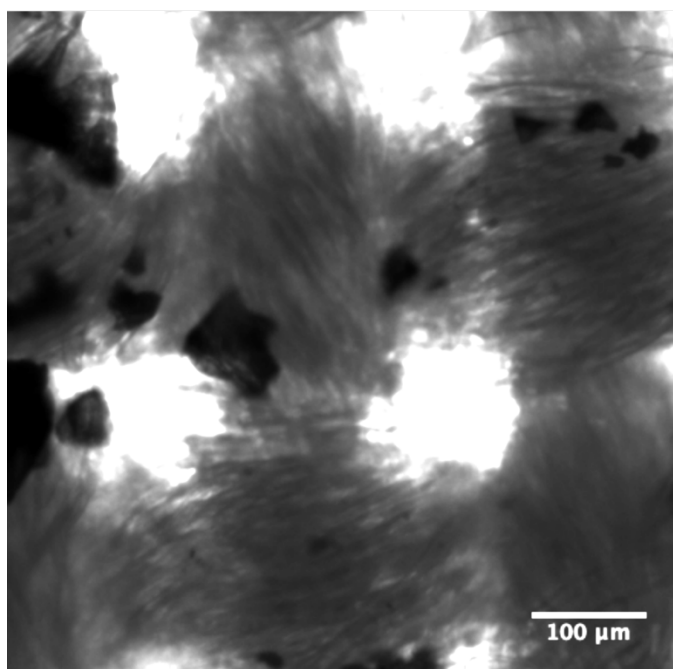

**D** TexasRed Guest (non-reactive)

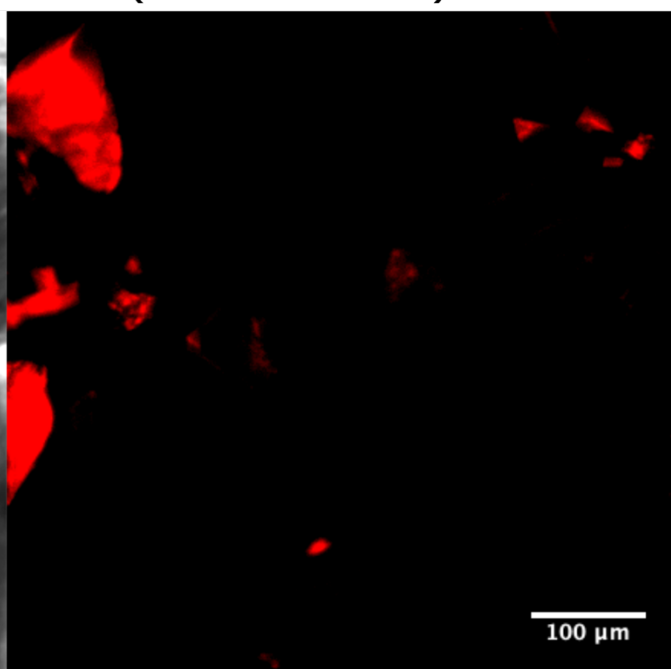

**Figure S5.** Variable labeling and loading of cotton-attached HEWL crystals. The merged channel (**A**) has several yellow regions where crystals were both trace-labeled via NHS-fluorescein and were able to uptake and retain non-reactive sulforhodamine 101 (TexasRed). (**B**) Relatively few crystals (or zones within crystals) were successfully labeled with NHS-fluorescein. (**C**) Irregular crystal domains are visible as darker regions in the DIC image. (**D**) Most, but not all, of the visible crystals were found to have taken up sulforhodamine 101 during a 24-hour incubation. We did not attempt to count puncta in this case because the boundaries between crystals or crystal fragments were not clear.



**A** Merged Image

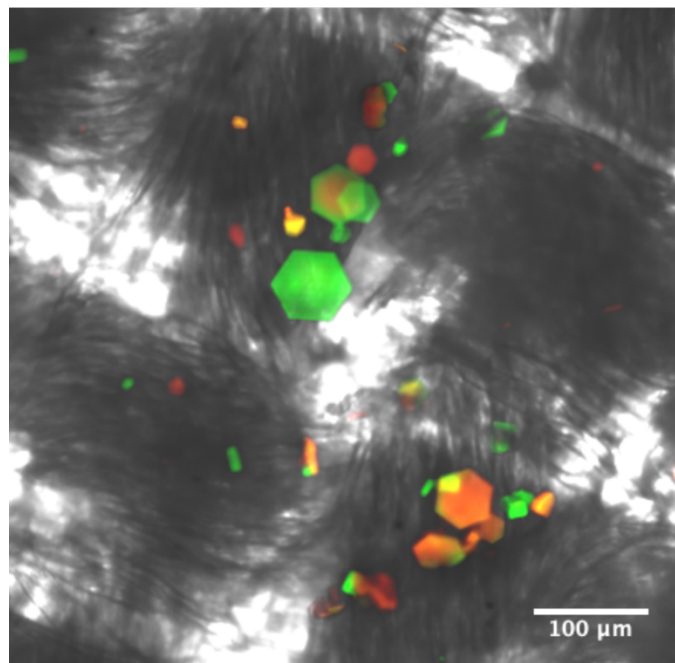

**B** NHS-Fluorescein-labeled  
CJ Crystals

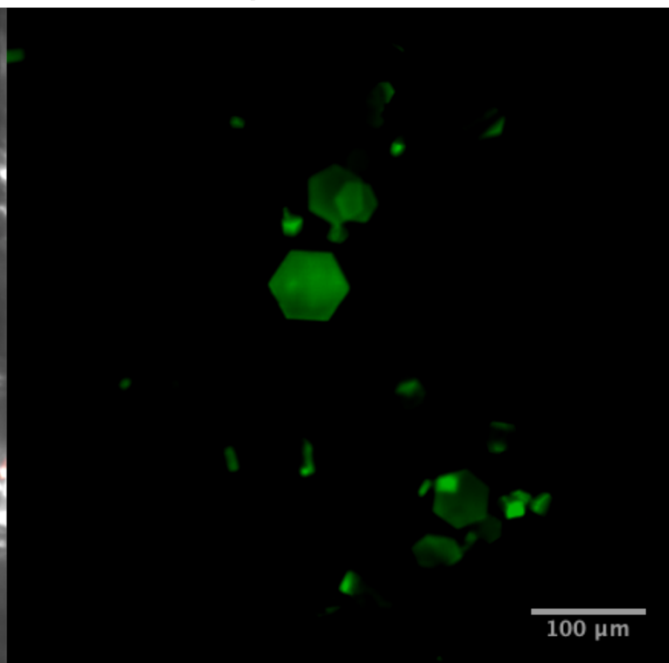

**C** DIC Image

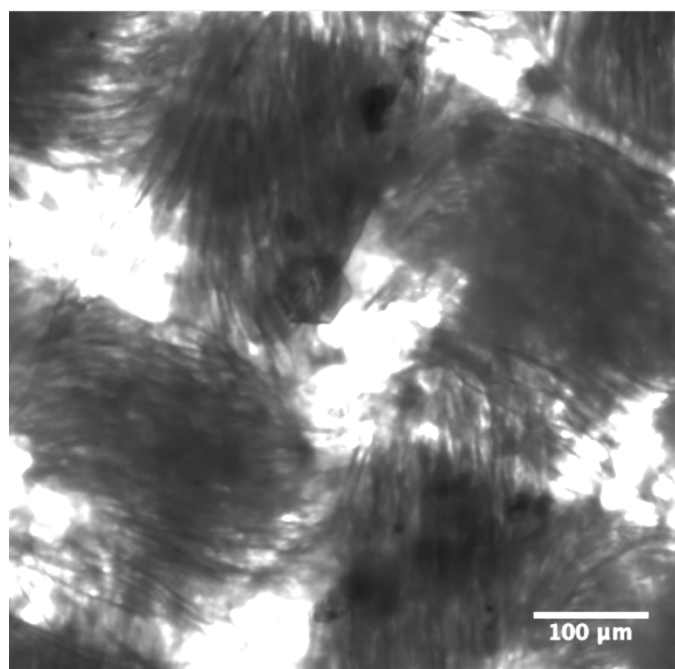

**D** NHS-TexasRed-labeled  
p450 Guest

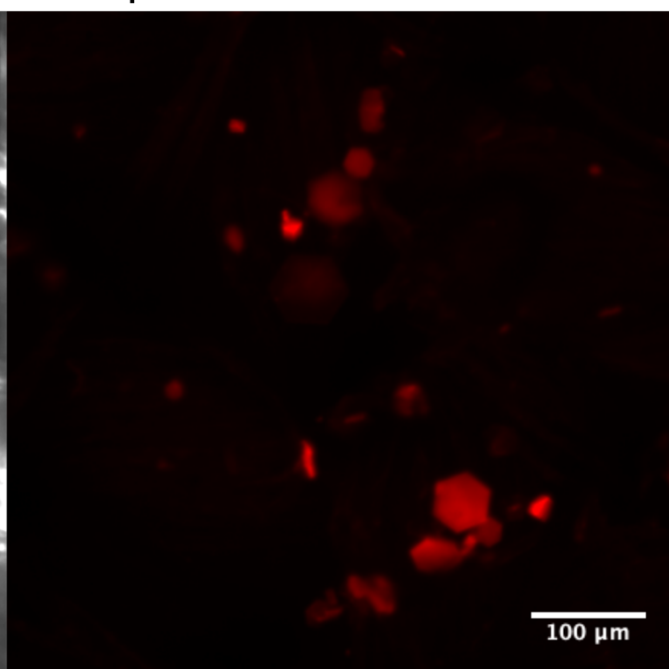

**Figure S6.** Variable labeling and loading of cotton-attached CJ crystals. The merged channel (**A**) has several yellow regions where NHS-fluorescein trace labeling and NHS-TexasRed (sulforhodamine 101) labeled p450 signals have comparable intensity. (**B**) Most, but not all, of the CJ crystals appear to have been successfully trace labeled with NHS-fluorescein. (**C**) CJ crystals are less visible than HEWL crystals in the DIC image, perhaps due to lower protein density. (**D**) Most, but not all, of the CJ crystals appear to have adsorbed TexasRed-labeled guest enzyme. Approximate puncta counting (including faint signals) yields 10 features that only appear in the green channel, 12 features that only appear in the red channel, and 17 features that appear on both channels.

---

**Video S1.** Time-lapse images textile swatch before accelerated laundering and after 15, 30, 45, and 60 minutes of accelerated laundering.

**Video S2.** Time-lapse (34 minutes, 2-minute interval) confocal microscope images showing TR-P450 enzyme (red) diffusing into cotton-attached CJ crystals (green).

**Video S3.** Z-stack video (5 layers, 5-micron focal plane difference) confocal microscope images showing TR-P450 enzyme (red) loaded within a subset of the cotton-attached CJ crystals (green).
